# Supplementary material for: An efficacious multifunction codoping strategy on a room-temperature solution-processed hole transport layer for realizing high-performance perovskite solar cells
Source: Royal Society of Chemistry journal article supplement (doi:10.1039/d0ta05873d), 2020-11-03
Supplement: d0ta05873d1.pdf [file d0ta05873d1.pdf]

## Supplementary Information

### **Efficacious multifunction codoping strategy on the room-temperature solution-processed hole transport layer for realizing high-performance perovskite solar cells**

Dan Ouyang, Jiawei Zheng, Zhanfeng Huang, Lu Zhu, and Wallace C. H. Choy\*

*Department of Electrical and Electronic Engineering, The University of Hong Kong,  
Pokfulam Road, Hong Kong 999077, China  
E-mail: chchoy@eee.hku.hk*

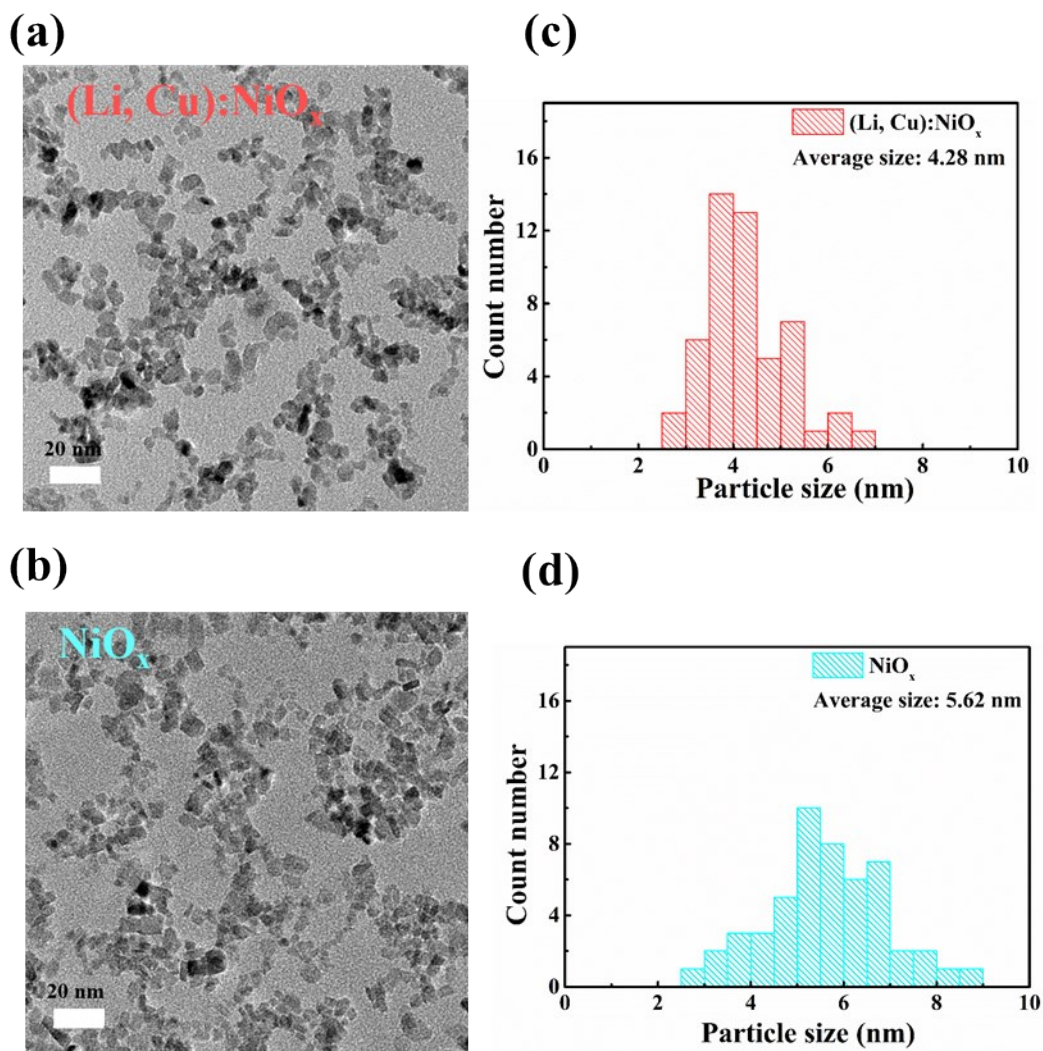

**Fig. S1** TEM image of as-synthesized (a) (Li,Cu):NiO<sub>x</sub> NPs and (b) pristine NiO<sub>x</sub> and. Size distribution of (c) (Li, Cu):NiO<sub>x</sub> and (d) pristine NiO<sub>x</sub> NPs.

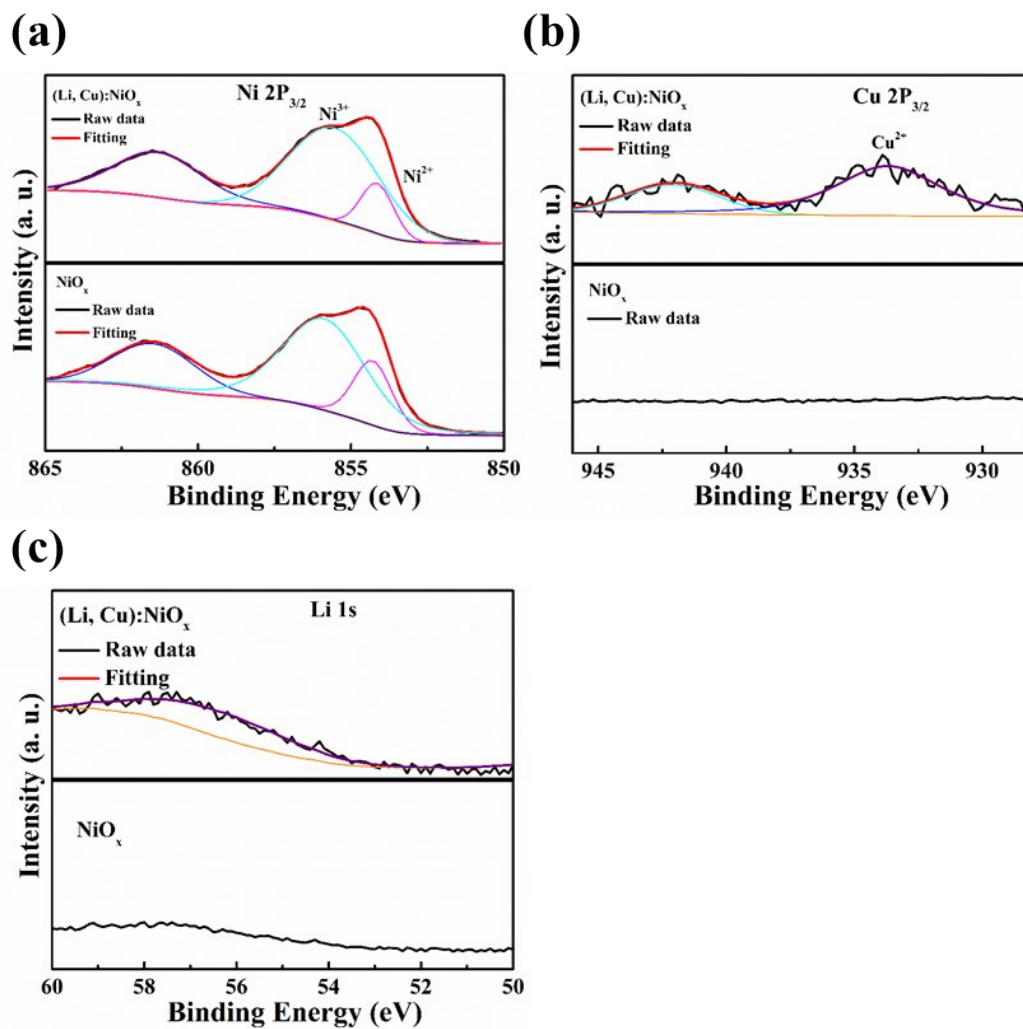

**Fig. S2** High-resolution XPS spectra of (a) Ni 2p<sub>3/2</sub>, (b) Cu 2p<sub>3/2</sub> and (c) Li 1s elements for NiO<sub>x</sub> and (Li,Cu):NiO<sub>x</sub> NPs.

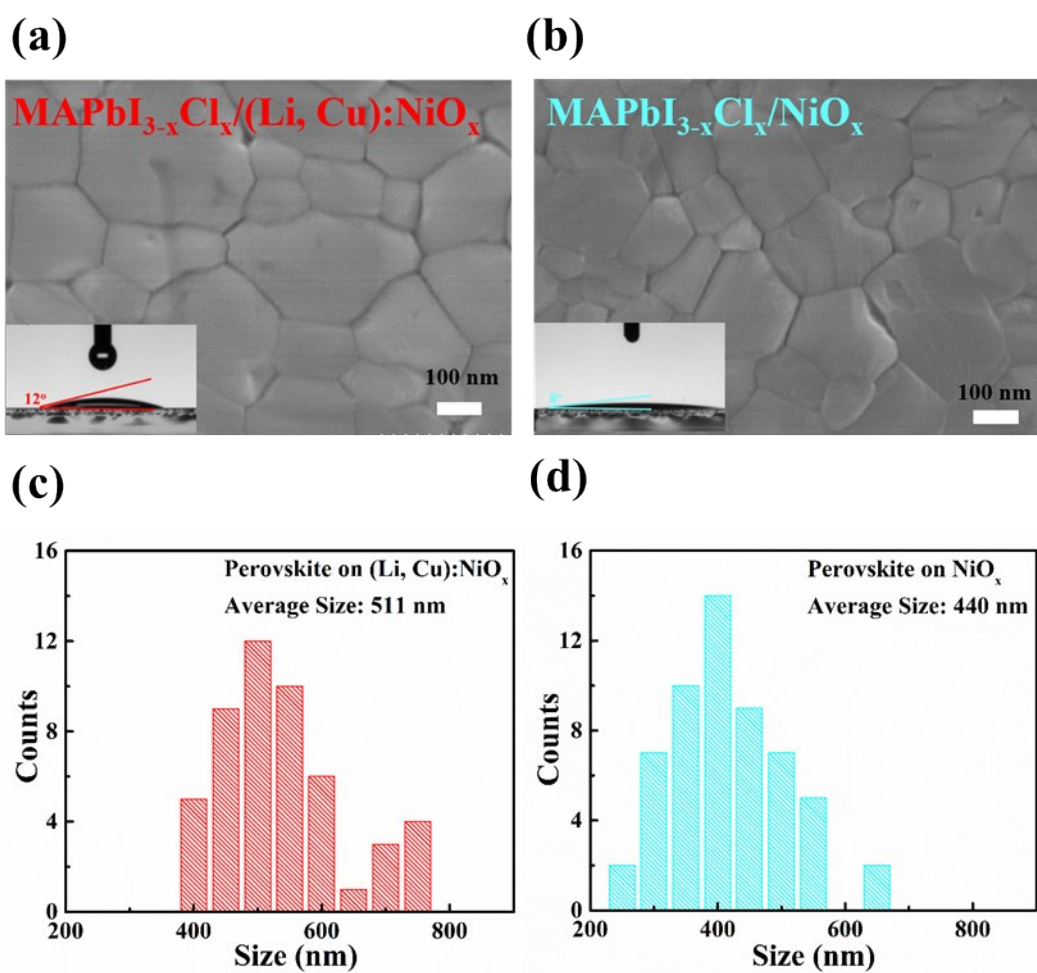

**Fig. S3** SEM images of the perovskite film on (a) (Li,Cu):NiO<sub>x</sub>, and (b) NiO<sub>x</sub> films on ITO glass. Inserting is contact angle images of (Li,Cu):NiO<sub>x</sub>, and NiO<sub>x</sub> films, respectively. Size distribution of perovskite crystals on (c) (Li,Cu):NiO<sub>x</sub> and (d) pristine NiO<sub>x</sub> NPs, respectively.

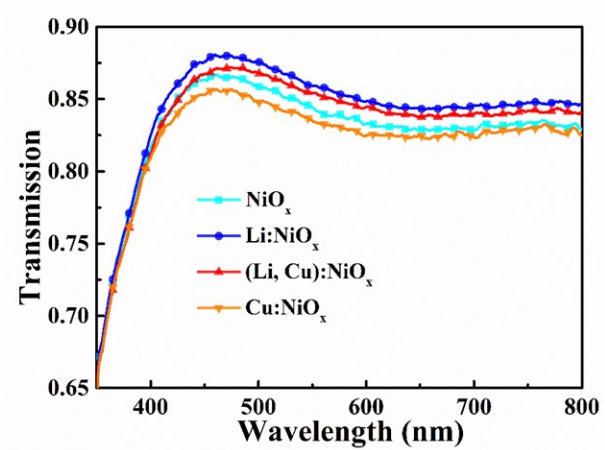

**Fig. S4** Transmittance spectra of pristine  $\text{NiO}_x$ ,  $\text{Li:NiO}_x$ ,  $(\text{Li,Cu}):NiO_x$ , and  $\text{Cu:NiO}_x$  films on ITO glass.

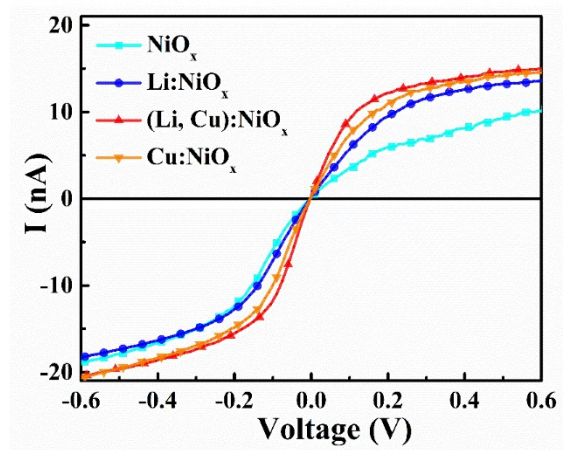

**Fig. S5** I-V conducting curves of pristine NiO<sub>x</sub>, Li:NiO<sub>x</sub>, (Li,Cu):NiO<sub>x</sub>, and Cu:NiO<sub>x</sub> films measured from the c-AFM mode.

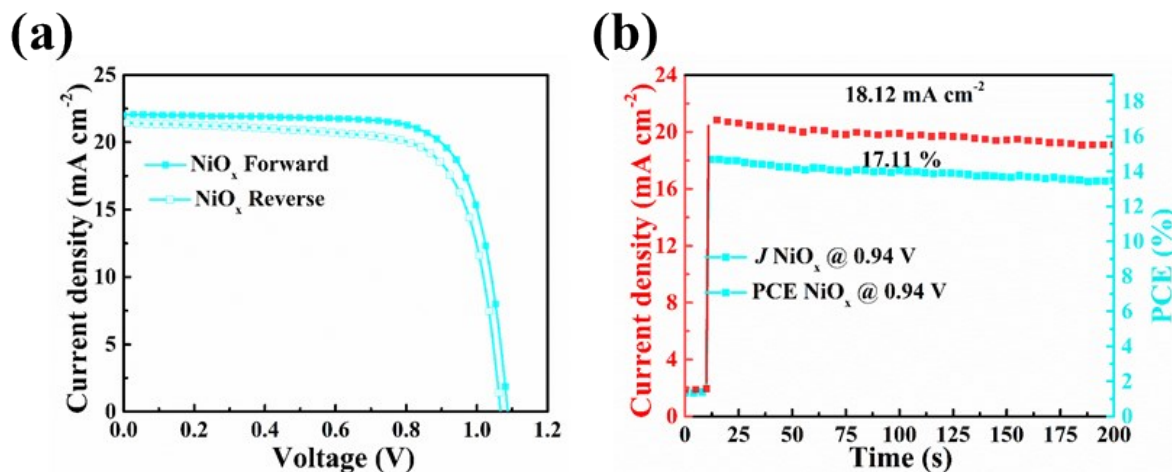

**Fig. S6** (a) *J*-*V* characteristics of the best NiO<sub>x</sub> based PSCs extracted from forward and reverse sweeping. (b) Steady photocurrent (red) and PCE (blue) under 1 Sun illumination of the best NiO<sub>x</sub> based PSCs.

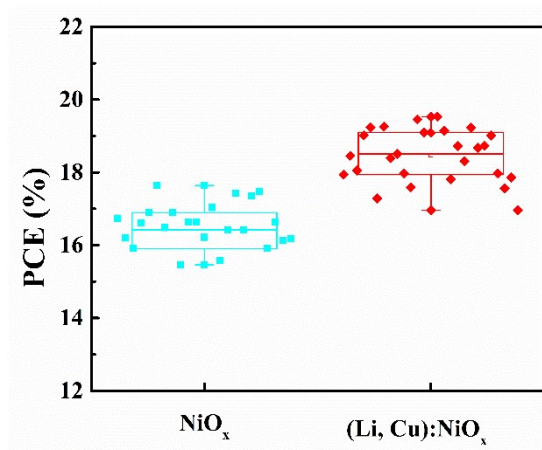

**Fig. S7** PCE histogram of 30 pristine  $\text{NiO}_x$  and  $(\text{Li, Cu}): \text{NiO}_x$  based PSC devices.



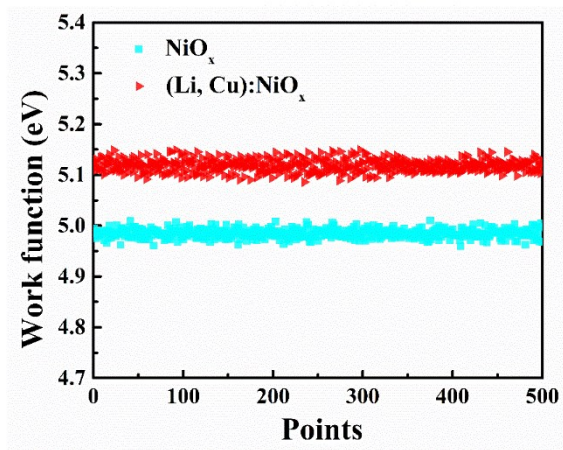

**Fig. S8** Work function of  $(\text{Li, Cu}): \text{NiO}_x$  HTL from Kelvin Probe.

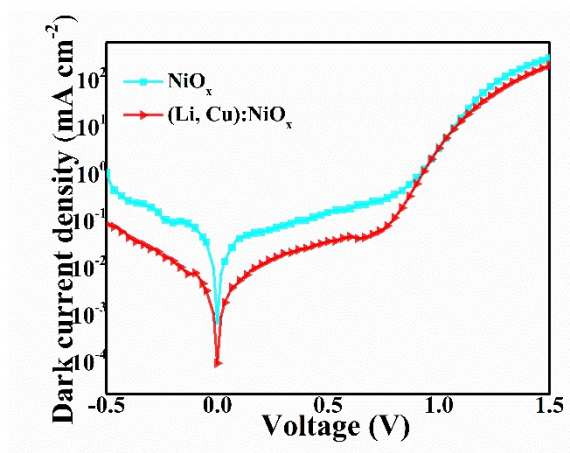

**Fig. S9** The dark  $J$ - $V$  curves of the best-inverted PSCs based on pristine NiO<sub>x</sub> and (Li,Cu):NiO<sub>x</sub>.

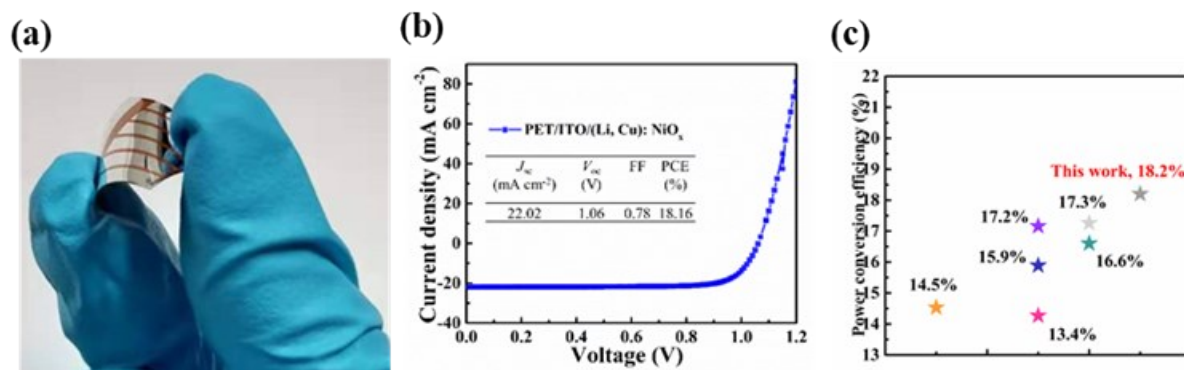

**Fig. S10** (a) Photograph of a typical flexible PSC. (b) J-V characterization of (Li,Cu):NiO<sub>x</sub> HTL based flexible device. (c) The efficiency of reported NiO<sub>x</sub> based flexible devices.

**Table S1** Performance of the reported planar PSCs based on NiO<sub>x</sub> and doped NiO<sub>x</sub> film.

| Device Architecture                                                                                                                                                               | V <sub>oc</sub><br>(V) | J <sub>sc</sub><br>(mA<br>cm <sup>-2</sup> ) | FF          | PCE<br>(%)  | Method                  | Ref.             |
|-----------------------------------------------------------------------------------------------------------------------------------------------------------------------------------|------------------------|----------------------------------------------|-------------|-------------|-------------------------|------------------|
| FTO/NiO <sub>x</sub> /Cs <sub>0.05</sub> (MA <sub>0.17</sub> FA <sub>0.83</sub> ) <sub>0.95</sub> Pb(I <sub>0.9</sub> Br <sub>0.1</sub> ) <sub>3</sub> /PCBM/TiO <sub>x</sub> /Ag | 1.10                   | 23.0                                         | 0.81        | 20.65       | NPs                     | 1                |
| ITO/NiO <sub>x</sub> /MA <sub>1-y</sub> FA <sub>y</sub> PbI <sub>3-x</sub> Cl <sub>x</sub> /PCBM/BCP/Ag                                                                           | 1.12                   | 23.7                                         | 0.76        | 20.2        | Combustion              | 2                |
| ITO/NiO <sub>x</sub> /MAPbI <sub>3</sub> /C <sub>60</sub> /SnO <sub>2</sub> /Ag                                                                                                   | 1.12                   | 21.8                                         | 0.77        | 18.8        | Sol-gel                 | 3                |
| ITO/NiO <sub>x</sub> /Cs <sub>0.05</sub> (MA <sub>0.17</sub> FA <sub>0.83</sub> ) <sub>0.95</sub> Pb(I <sub>0.9</sub> Br <sub>0.1</sub> ) <sub>3</sub> /PCBM/ZnO/Al               | 1.02                   | 22.2                                         | 0.82        | 18.6        | NPs                     | 4                |
| ITO/NiO <sub>x</sub> /MAPbI <sub>3</sub> /PCBM/Ti(Nb)O <sub>x</sub> /Ag                                                                                                           | 1.07                   | 21.9                                         | 0.79        | 18.5        | NPs                     | 5                |
| FTO/NiO <sub>x</sub> /MAPbI <sub>3</sub> /PCBM/BCP/Ag                                                                                                                             | 1.00                   | 22.9                                         | 0.80        | 18.2        | Sol-gel                 | 6                |
| ITO/NiO <sub>x</sub> /MAPbI <sub>3</sub> /C <sub>60</sub> /Bis-C <sub>60</sub> /Ag                                                                                                | 1.03                   | 21.8                                         | 0.78        | 17.7        | NPs                     | 7                |
| ITO/NiO <sub>x</sub> /MAPbI <sub>3</sub> /PCBM/Bis-C <sub>60</sub> /Ag                                                                                                            | 1.10                   | 21.7                                         | 0.75        | 17.6        | Sol-gel                 | 8                |
| ITO/NiO <sub>x</sub> /MAPbI <sub>3</sub> /PCBM/BCP/Ag                                                                                                                             | 1.02                   | 21.8                                         | 0.79        | 17.6        | Spray pyrolysis         | 9                |
| ITO/PLD-NiO <sub>x</sub> /MAPbI <sub>3</sub> /PCBM/LiF/Ag                                                                                                                         | 1.06                   | 20.2                                         | 0.81        | 17.3        | PLD                     | 10               |
| ITO/NiO <sub>x</sub> /MAPbI <sub>3</sub> /PCBM/Ag                                                                                                                                 | 1.04                   | 22.5                                         | 0.72        | 16.9        | Electrodeposited        | 11               |
| ITO/NiO <sub>x</sub> /MAPbI <sub>3</sub> /PCBM/Ag                                                                                                                                 | 1.07                   | 20.6                                         | 0.75        | 16.5        | NPs                     | 12               |
| ITO/NiO <sub>x</sub> /MAPbI <sub>3</sub> /PCBM/Ag                                                                                                                                 | 1.04                   | 21.9                                         | 0.72        | 16.4        | ALD                     | 13               |
| ITO/NiO <sub>x</sub> /MAPbI <sub>3</sub> /PCBM/BCP/Ag                                                                                                                             | 0.98                   | 19.7                                         | 0.64        | 12.4        | Sputtering              | 14               |
| ITO/Cu:NiO <sub>x</sub> /MAPbI <sub>3</sub> /PCBM/C <sub>60</sub> /Ag                                                                                                             | 1.12                   | 22.2                                         | 0.81        | 20.1        | NPs                     | 15               |
| ITO/Zn:NiO <sub>x</sub> /MAPbI <sub>3</sub> /PCBM/C <sub>60</sub> /Ag                                                                                                             | 1.10                   | 22.8                                         | 0.78        | 19.6        | Sol-gel                 | 16               |
| FTO/Sr:NiO <sub>x</sub> /MAPbI <sub>3</sub> /PCBM/BCP/Ag                                                                                                                          | 1.14                   | 22.7                                         | 0.76        | 19.5        | Sol-gel                 | 17               |
| FTO/Cs:NiO <sub>x</sub> /MAPbI <sub>3</sub> /PCBM/Zracac/Ag                                                                                                                       | 1.12                   | 21.8                                         | 0.79        | 19.4        | Sol-gel                 | 18               |
| FTO/Ca:NiO <sub>x</sub> /MAPbI <sub>3</sub> /PCBM/BCP/Ag                                                                                                                          | 1.13                   | 22.3                                         | 0.74        | 18.7        | Sol-gel                 | 17               |
| FTO/Mg:NiO <sub>x</sub> /MAPbI <sub>3</sub> /PCBM/BCP/Ag                                                                                                                          | 1.10                   | 22.4                                         | 0.75        | 18.3        | Sol-gel                 | 17               |
| ITO/K:NiO <sub>x</sub> /MAPbI <sub>3</sub> /PCBM:C <sub>60</sub> /BCP/Ag                                                                                                          | 1.01                   | 22.8                                         | 0.78        | 18.1        | Sol-gel                 | 19               |
| FTO/Li:NiO <sub>x</sub> /MAPbI <sub>3</sub> /PCBM/Al                                                                                                                              | 1.03                   | 19.4                                         | 0.72        | 14.2        | Sol-gel                 | 20               |
| ITO/Cu:NiO <sub>x</sub> /MAPbI <sub>3</sub> /C <sub>60</sub> /Bis-C <sub>60</sub> /Ag                                                                                             | 1.05                   | 22.2                                         | 0.76        | 17.7        | Combustion              | 21               |
| ITO/Ag:NiO <sub>x</sub> /MAPbI <sub>3</sub> /PCBM/C <sub>60</sub> /Ag                                                                                                             | 1.09                   | 21.1                                         | 0.78        | 17.3        | Sol-gel                 | 22               |
| ITO/Cs:NiO <sub>x</sub> /MAPbI <sub>3</sub> /PCBM/C <sub>60</sub> /Au                                                                                                             | 1.03                   | 21.4                                         | 0.78        | 17.2        | Sol-gel                 | 23               |
| ITO/Rb:NiO <sub>x</sub> /MAPbI <sub>3</sub> /PCBM/BCP/Ag                                                                                                                          | 1.05                   | 21.8                                         | 0.75        | 17.2        | Sol-gel                 | 24               |
| ITO/Cu:NiO <sub>x</sub> /MAPbI <sub>3</sub> /C <sub>60</sub> /Bis-C <sub>60</sub> /Ag                                                                                             | 1.11                   | 19.1                                         | 0.72        | 15.4        | Sol-gel                 | 25               |
| FTO/La:NiO <sub>x</sub> /MAPbI <sub>3</sub> /PCBM/BCP/Ag                                                                                                                          | 1.03                   | 20.7                                         | 0.71        | 15.3        | Sol-gel                 | 26               |
| ITO/Co:NiO <sub>x</sub> /MAPbI <sub>3</sub> /PCBM/BCP/Ag                                                                                                                          | 1.06                   | 17.3                                         | 0.79        | 14.5        | NPs                     | 27               |
| ITO/Li,Ag:NiO <sub>x</sub> /MAPbI <sub>3</sub> /PCBM/BCP/Ag                                                                                                                       | 1.13                   | 21.3                                         | 0.80        | 19.2        | Sol-gel, 300 °C         | 28               |
| FTO/Li <sub>0.05</sub> Mg <sub>0.15</sub> Ni <sub>0.8</sub> O <sub>x</sub> /Psk/Ti(Nb)O <sub>x</sub> /Ag                                                                          | 1.12                   | 22.7                                         | 0.77        | 19.6        | Spray pyrolysis, 500 °C | 29               |
| ITO/Li,Pb:NiO <sub>x</sub> /MAPbI <sub>3</sub> /PCBM/BCP/Ag                                                                                                                       | 1.01                   | 21.3                                         | 0.79        | 17.4        | Sol-gel, 450 °C         | 30               |
| ITO/Li,Cu:NiO <sub>x</sub> /MAPbI <sub>3</sub> /PCBM/Ag                                                                                                                           | 0.96                   | 20.8                                         | 0.72        | 14.5        | Sol-gel, 500 °C         | 31               |
| <b>ITO/(Li,Cu):NiO<sub>x</sub>/MAPbI<sub>3-x</sub>Cl<sub>x</sub>/PCBM:C<sub>60</sub>/Zracac/Ag</b>                                                                                | <b>1.11</b>            | <b>23.1</b>                                  | <b>0.81</b> | <b>20.8</b> | <b>NPs, 25 °C</b>       | <b>this work</b> |

**Table S2** The WF variation of pristine NiO<sub>x</sub> and doped NiO<sub>x</sub> film characterized by Kelvin-Probe measurements.  $\Delta E_F$  is defined as the energy level offsets of the doped film and pristine film.

| Material                  | WF (eV)   | $\Delta E_F$ (eV) |
|---------------------------|-----------|-------------------|
| NiO <sub>x</sub>          | 4.99±0.01 | 0                 |
| Li:NiO <sub>x</sub>       | 5.07±0.0  | 0.08              |
| (Li, Cu):NiO <sub>x</sub> | 5.12±0.0  | 0.13              |
| Cu:NiO <sub>x</sub>       | 5.02±0.0  | 0.03              |

**Table S3** Summary of device performance with (Li,Cu):NiO<sub>x</sub> HTL treated at varying temperatures. The best PCEs are shown in brackets.

| Samples | V <sub>oc</sub><br>(V) | J <sub>sc</sub><br>(mA cm <sup>-2</sup> ) | FF   | PCE<br>(%)   |
|---------|------------------------|-------------------------------------------|------|--------------|
| RT      | 1.08                   | 22.61                                     | 0.78 | 19.01(20.83) |
| 100 °C  | 1.05                   | 21.88                                     | 0.80 | 18.36(18.63) |
| 150 °C  | 1.04                   | 21.96                                     | 0.80 | 18.30(18.52) |
| 200 °C  | 1.04                   | 21.95                                     | 0.81 | 18.49(18.67) |
| 250 °C  | 1.04                   | 22.12                                     | 0.81 | 18.64(19.00) |
| 300 °C  | 1.02                   | 21.99                                     | 0.81 | 17.99(18.60) |

**Table S4** Devices performance based on NiO<sub>x</sub> HTL with different doping elements.

| Doping element | Scan direction | $J_{sc}$ (mA cm <sup>-2</sup> ) | $V_{oc}$ (V) | FF   | PCE (%) |
|----------------|----------------|---------------------------------|--------------|------|---------|
| N/A            | Forward        | 22.02                           | 1.09         | 0.75 | 17.91   |
|                | Reverse        | 21.45                           | 1.07         | 0.73 | 16.75   |
| Li             | Forward        | 22.69                           | 1.08         | 0.71 | 17.49   |
|                | Reverse        | 22.46                           | 1.07         | 0.71 | 17.10   |
| (Li, Cu)       | Forward        | 23.07                           | 1.09         | 0.80 | 20.08   |
|                | Reverse        | 22.84                           | 1.10         | 0.80 | 20.07   |
| Cu             | Forward        | 22.54                           | 1.05         | 0.75 | 17.76   |
|                | Reverse        | 21.67                           | 1.03         | 0.66 | 14.89   |

**Table S5** Devices performance based on (Li,Cu):NiO<sub>x</sub> HTL with different doping concentrations.

| Total doping concentration (%) | Ratio of Li/Cu | Scan direction | $J_{sc}$ (mA cm <sup>-2</sup> ) | $V_{oc}$ (V) | FF   | PCE (%) |
|--------------------------------|----------------|----------------|---------------------------------|--------------|------|---------|
| 0                              | 0              | Forward        | 22.02                           | 1.09         | 0.75 | 17.91   |
|                                |                | Reverse        | 21.45                           | 1.07         | 0.73 | 16.75   |
| 5                              | 2/1            | Forward        | 23.07                           | 1.09         | 0.80 | 20.08   |
|                                |                | Reverse        | 22.84                           | 1.10         | 0.80 | 20.07   |
| 10                             | 2/1            | Forward        | 22.23                           | 1.05         | 0.74 | 17.37   |
|                                |                | Reverse        | 21.84                           | 1.03         | 0.71 | 16.14   |
| 20                             | 2/1            | Forward        | 16.55                           | 1.01         | 0.72 | 12.00   |
|                                |                | Reverse        | 15.58                           | 0.99         | 0.60 | 9.19    |

## Reference

- 1 Y. Zhao, H. Zhang, X. Ren, H. L. Zhu, Z. Huang, F. Ye, D. Ouyang, K. W. Cheah, A. K. Y. Jen and W. C. H. Choy, *ACS Energy Lett.*, 2018, **3**, 2891-2898.
- 2 Z. Liu, J. Chang, Z. Lin, L. Zhou, Z. Yang, D. Chen, C. Zhang, S. F. Liu and Y. Hao, *Adv. Energy Mater.*, 2018, **8**, 1703432.
- 3 Z. Zhu, Y. Bai, X. Liu, C. C. Chueh, S. Yang and A. K. Jen, *Adv. Mater.*, 2016, **28**, 6478-6484.
- 4 M. Najafi, F. Di Giacomo, D. Zhang, S. Shanmugam, A. Senes, W. Verhees, A. Hadipour, Y. Galagan, T. Aernouts, S. Veenstra and R. Andriessen, *Small*, 2018, **14**, e1702775.
- 5 J. He, E. Bi, W. Tang, Y. Wang, Z. Zhou, X. Yang, H. Chen and L. Han, *Solar RRL*, 2018, **2**, 1800004.
- 6 X. C. Li Juan Tang, Tian Yu Wen, Shuang Yang, Jun Jie Zhao, Hong Wei Qiao, Yu Hou, Hua Gui Yang, *Chem. Eur. J.*, 2018, **24**, 2845-2849.
- 7 H. Zhang, J. Cheng, F. Lin, H. He, J. Mao, K. S. Wong, A. K. Jen and W. C. Choy, *ACS Nano*, 2016, **10**, 1503-1511.
- 8 S. Xiao, Y. Bai, X. Meng, T. Zhang, H. Chen, X. Zheng, C. Hu, Y. Qu and S. Yang, *Adv. Funct. Mater.*, 2017, **27**, 1604944.
- 9 F. Ye, H. Chen, F. Xie, W. Tang, M. Yin, J. He, E. Bi, Y. Wang, X. Yang and L. Han, *Energy Environ. Sci.*, 2016, **9**, 2295-2301.

- 10 J. H. Park, J. Seo, S. Park, S. S. Shin, Y. C. Kim, N. J. Jeon, H. W. Shin, T. K. Ahn, J. H. Noh, S. C. Yoon, C. S. Hwang and S. I. Seok, *Adv. Mater.*, 2015, **27**, 4013-4019.
- 11 I. J. Park, G. Kang, A. P. Min, S. K. Ju and Y. K. Jin, *Chemsuschem*, 2017, **10**.
- 12 X. Yin, P. Chen, M. Que, Y. Xing, W. Que, C. Niu and J. Shao, *ACS Nano*, 2016, **10**, 3630-3636.
- 13 S. Seo, I. J. Park, M. Kim, S. Lee, C. Bae, H. S. Jung, N. G. Park, J. Y. Kim and H. Shin, *Nanoscale*, 2016, **8**, 11403-11412.
- 14 H. Lee, Y. T. Huang, M. W. Horn and S. P. Feng, *Sci. Rep.*, 2018, **8**, 5590.
- 15 W. Chen, Y. Wu, J. Fan, A. B. Djurišić, F. Liu, H. W. Tam, A. Ng, C. Surya, W. K. Chan, D. Wang and Z.-B. He, *Adv. Energy Mater.*, 2018, **8**, 1703519.
- 16 X. Wan, Y. Jiang, Z. Qiu, H. Zhang, X. Zhu, I. Sikandar, X. Liu, X. Chen and B. Cao, *ACS Appl. Energy Mater.*, 2018, **1**, 3947-3954.
- 17 B. Ge, H. W. Qiao, Z. Q. Lin, Z. R. Zhou, A. P. Chen, S. Yang, Y. Hou and H. G. Yang, *Solar RRL*, 2019, **3**, 1900192.
- 18 W. Chen, F.-Z. Liu, X.-Y. Feng, A. B. Djurišić, W. K. Chan and Z.-B. He, *Adv. Energy Mater.*, 2017, **7**, 1700722.
- 19 X. Yin, J. Han, Y. Zhou, Y. Gu, M. Tai, H. Nan, Y. Zhou, J. Li and H. Lin, *J. Mater. Chem. A*, 2019, **7**, 5666-5676.
- 20 Z. Saki, K. Sveinbjornsson, G. Boschloo and N. Taghavinia, *Chemphyschem*, 2019, **20**, 3322-3327.
- 21 J. W. Jung, C. C. Chueh and A. K. Jen, *Adv. Mater.*, 2015, **27**, 7874-7880.
- 22 J. Zheng, L. Hu, J. S. Yun, M. Zhang, C. F. J. Lau, J. Bing, X. Deng, Q. Ma, Y. Cho, W. Fu, C. Chen, M. A. Green, S. Huang and A. W. Y. Ho-Baillie, *ACS Appl. Energy Mater.*, 2018, **1**, 561-570.
- 23 H. S. Kim, J. Y. Seo, H. Xie, M. Lira-Cantu, S. M. Zakeeruddin, M. Gratzel and A. Hagfeldt, *ACS Omega*, 2017, **2**, 9074-9079.
- 24 Q. Fu, S. Xiao, X. Tang and T. Hu, *Org. Electron.*, 2019, **69**, 34-41.
- 25 J. H. Kim, P. W. Liang, S. T. Williams, N. Cho, C. C. Chueh, M. S. Glaz, D. S. Ginger and A. K. Jen, *Adv. Mater.*, 2015, **27**, 695-701.
- 26 S. Teo, Z. Guo, Z. Xu, C. Zhang, Y. Kamata, S. Hayase and T. Ma, *ChemSusChem*, 2019, **12**, 518-526.
- 27 R. Kaneko, T. H. Chowdhury, G. Wu, M. E. Kayesh, S. Kazaoui, K. Sugawa, J.-J. Lee, T. Noda, A. Islam and J. Otsuki, *Solar Energy*, 2019, **181**, 243-250.
- 28 X. Xia, Y. Jiang, Q. Wan, X. Wang, L. Wang and F. Li, *ACS Appl. Mater. Interfaces*, 2018, **10**, 44501-44510.
- 29 W. Chen, Y. Wu, Y. Yue, J. Liu, W. Zhang, X. Yang, H. Chen, E. Bi, I. Ashraful, M. Gratzel and L. Han, *Science*, 2015, **350**, 944-948.
- 30 D. Hou, J. Zhang, X. Gan, H. Yuan, L. Yu, C. Lu, H. Sun, Z. Hu and Y. Zhu, *J. Colloid Interface Sci.*, 2020, **559**, 29-38.
- 31 M. H. Liu, Z. J. Zhou, P. P. Zhang, Q. W. Tian, W. H. Zhou, D. X. Kou and S. X. Wu, *Opt. Express*, 2016, **24**, A1349-A1359.
